# Supplementary material
Source: publisher figshare collection journal article supplement (https://frontiersin.figshare.com/ndownloader/files/20273520)
Supplement: Supplementary file [file 20273520]

# Supplementary Material

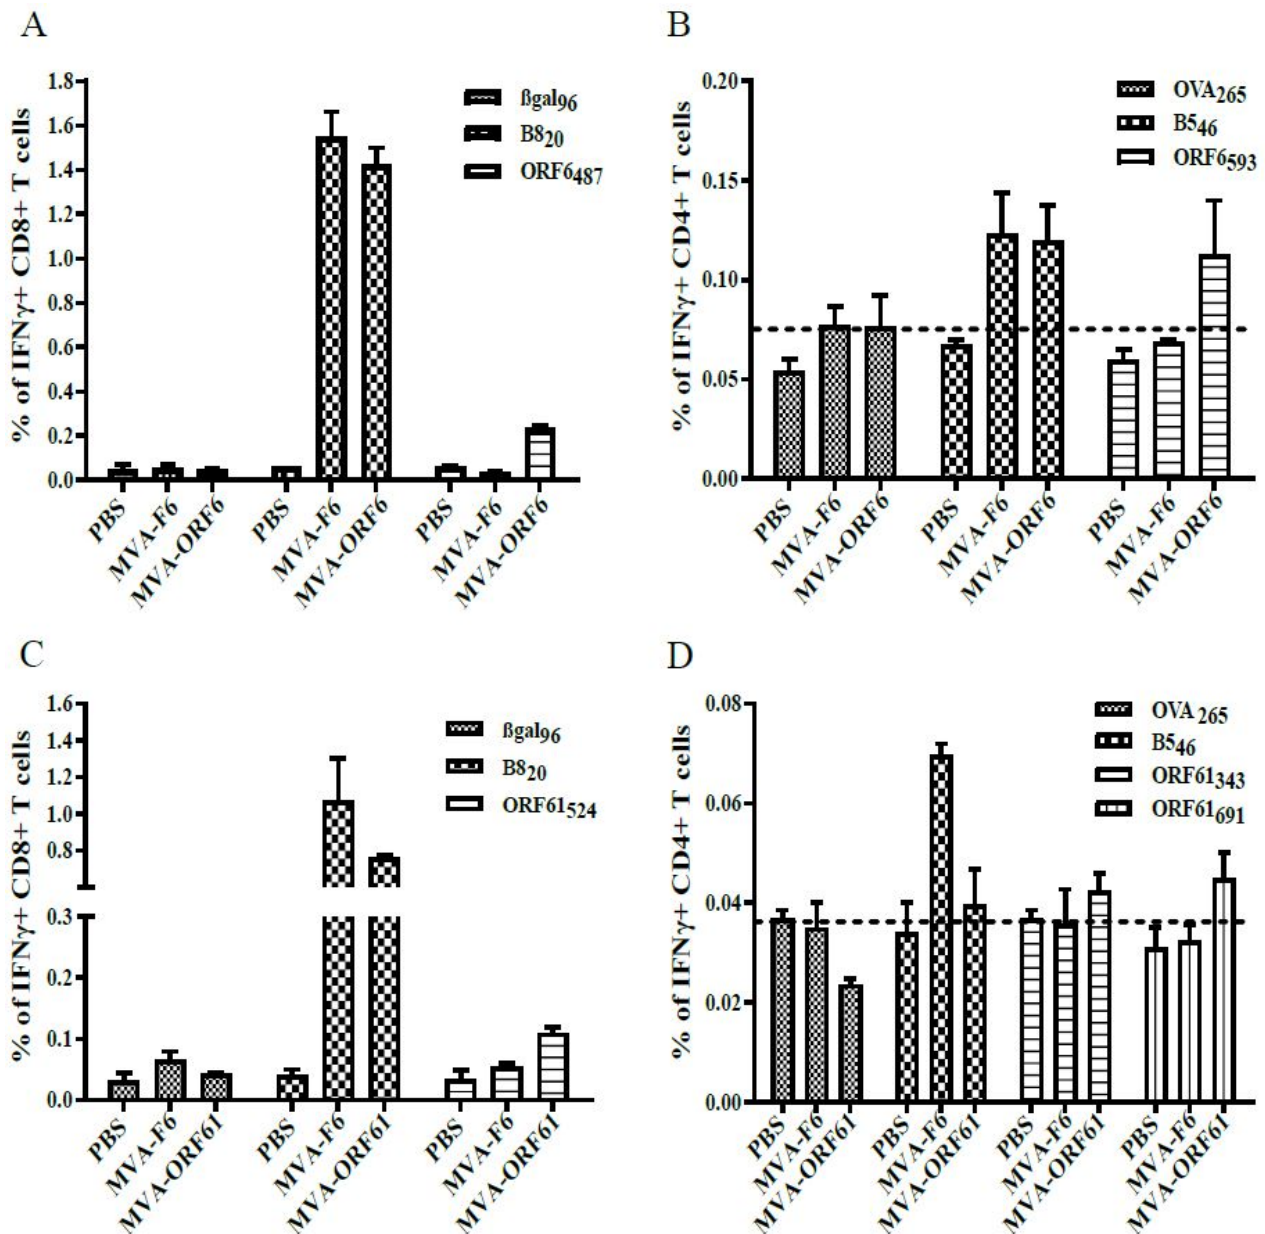

**Supplementary Figure 1.** Memory CD8+ and CD4+ T cell responses after i.p. vaccination of C57BL/6 mice with  $1 \times 10^8$  IU/200 $\mu$ l MVA-F6, MVA-ORF6, MVA-ORF61 or PBS. For *ex vivo* T cell analysis (ICS followed by FACS) splenocytes were prepared from immunized mice at 35 dpi. (A, B) ORF6-specific memory T cells. Frequencies of IFN $\gamma$  producing CD8+ (A) and CD4+ T cells (B). (C, D) ORF61-specific memory T cells. Frequencies of IFN $\gamma$  producing CD8+ (C) and CD4+ T cells (D). (A, C)  $\beta$ gal<sub>96</sub> or B8<sub>20</sub> peptides as well as OVA<sub>265</sub> or B5<sub>46</sub> peptides (B, D) were used as unrelated or MVA-specific peptide controls, respectively. Data shown are mean  $\pm$  SEM of n=6 mice per group, pooled from 2 independent experiments.
